# Supplementary material
Source: PubMed Central journal article supplement (PMC6898786)
Supplement: NIHMS1541541-supplement-1.pdf [file NIHMS1541541-supplement-1.pdf]

**Supplementary Information for Vehik K, Lynch KF, Wong MC, et al. Prospective virome analyses in young children at increased genetic risk for type 1 diabetes**

**This PDF contains:**

Members of the TEDDY Study Group

## Members of the TEDDY Study Group

**Colorado Clinical Center:** Marian Rewers, M.D., Ph.D., PI<sup>1,4,5,6,10,11</sup>, Kimberly Bautista<sup>12</sup>, Judith Baxter<sup>9,12,15</sup>, Daniel Felipe-Morales, Kimberly Driscoll, Ph.D.<sup>9</sup>, Brigitte I. Frohnert, M.D.<sup>2,14</sup>, Marisa Gallant, M.D.<sup>13</sup>, Patricia Gesualdo<sup>2,6,12,14,15</sup>, Michelle Hoffman<sup>12,13,14</sup>, Rachel Karban<sup>12</sup>, Edwin Liu, M.D.<sup>13</sup>, Jill Norris, Ph.D.<sup>2,3,12</sup>, Andrea Steck, M.D.<sup>3,14</sup>, Kathleen Waugh<sup>6,7,12,15</sup>. University of Colorado, Anschutz Medical Campus, Barbara Davis Center for Childhood Diabetes.

**Finland Clinical Center:** Jorma Toppari, M.D., Ph.D., PI<sup>1,4,11,14</sup>, Olli G. Simell, M.D., Ph.D., Annika Adamsson, Ph.D.<sup>12</sup>, Suvi Ahonen<sup>\*§</sup>, Mari Åkerlund<sup>\*§</sup>, Anne Hekkala, M.D.<sup>µ</sup>, Henna Holappa<sup>µ</sup>, Heikki Hyöty, M.D., Ph.D.<sup>\*±6</sup>, Anni Ikonen<sup>µ</sup>, Jorma Ilonen, M.D., Ph.D.<sup>¶13</sup>, Sinikka Jäminki<sup>\*±</sup>, Sanna Jokipuu<sup>^12</sup>, Leena Karlsson<sup>^</sup>, Miia Kähönen<sup>µ12,14</sup>, Mikael Knip, M.D., Ph.D.<sup>\*±5</sup>, Minna-Liisa Koivikko<sup>µ</sup>, Mirva Koreasalo<sup>\*±§2</sup>, Kalle Kurppa, M.D., Ph.D.<sup>\*±13</sup>, Jarita Kytölä<sup>\*±</sup>, Tiina Latva-aho<sup>µ</sup>, Katri Lindfors, Ph.D.<sup>\*13</sup>, Maria Lönnrot, M.D., Ph.D.<sup>\*±6</sup>, Elina Mäntymäki<sup>^</sup>, Markus Mattila<sup>\*</sup>, Katja Multasuo<sup>µ</sup>, Teija Mykkänen<sup>µ</sup>, Tiina Niininen<sup>\*±12</sup>, Sari Niinistö<sup>±§2</sup>, Mia Nyblom<sup>\*±</sup>, Sami Oikarinen, Ph.D.<sup>\*±</sup>, Paula Ollikainen<sup>µ</sup>, Sirpa Pohjola<sup>µ</sup>, Petra Rajala<sup>^</sup>, Jenna Rautanen<sup>±§</sup>, Anne Riikonen<sup>\*±§</sup>, Minna Romo<sup>^</sup>, Suvi Ruohonen<sup>^</sup>, Satu Simell, M.D., Ph.D.<sup>¶13</sup>, Maija Sjöberg<sup>¶12</sup>, Aino Stenius<sup>µ12</sup>, Päivi Tossavainen, M.D.<sup>µ</sup>, Mari Vähä-Mäkilä<sup>^</sup>, Sini Vainionpää<sup>^12</sup>, Eeva Varjonen<sup>¶12</sup>, Riitta Veijola, M.D., Ph.D.<sup>µ14</sup>, Irene Viinikangas<sup>µ</sup>, Suvi M. Virtanen, M.D., Ph.D.<sup>\*±§2</sup>. ¶University of Turku, \*University of Tampere, µUniversity of Oulu, ^Turku University Hospital, Hospital District of Southwest Finland, ±Tampere University Hospital, °Oulu University Hospital, §National Institute for Health and Welfare, Finland, ¶University of Kuopio.

**Georgia/Florida Clinical Center:** Jin-Xiong She, Ph.D., PI<sup>1,3,4,11</sup>, Desmond Schatz, M.D.<sup>\*4,5,7,8</sup>, Diane Hopkins<sup>12</sup>, Leigh Steed<sup>12,13,14,15</sup>, Jennifer Bryant<sup>12</sup>, Katherine Silvis<sup>2</sup>, Michael Haller, M.D.<sup>\*14</sup>, Melissa Gardiner<sup>12</sup>, Richard McIndoe, Ph.D., Ashok Sharma, Stephen W. Anderson, M.D.<sup>^</sup>, Laura Jacobsen, M.D.<sup>\*14</sup>, John Marks, DHSc.<sup>\*14</sup>, P.D. Towe<sup>\*</sup>. Center for Biotechnology and Genomic Medicine, Augusta University. \*University of Florida, ^Pediatric Endocrine Associates, Atlanta.

**Germany Clinical Center:** Anette G. Ziegler, M.D., PI<sup>1,3,4,11</sup>, Ezio Bonifacio Ph.D.<sup>\*5</sup>, Miryam D'Angelo, Anita Gavrisan, Cigdem Gezginci, Anja Heublein, Verena Hoffmann, Ph.D.<sup>2</sup>, Sandra Hummel, Ph.D.<sup>2</sup>, Andrea Keimer<sup>¶2</sup>, Annette Knopff<sup>7</sup>, Charlotte Koch, Sibylle Koletzko, M.D.<sup>¶13</sup>, Claudia Ramminger<sup>12</sup>, Roswith Roth, Ph.D.<sup>9</sup>, Marlon Scholz, Joanna Stock<sup>9,12,14</sup>, Katharina Warncke, M.D.<sup>14</sup>, Lorena Wendel, Christiane Winkler, Ph.D.<sup>2,12,15</sup>. Forschergruppe Diabetes e.V. and Institute of Diabetes Research, Helmholtz Zentrum München, Forschergruppe Diabetes, and Klinikum rechts der Isar, Technische Universität München. \*Center for Regenerative Therapies, TU Dresden, ¶Dr. von Hauner Children's Hospital, Department of Gastroenterology, Ludwig Maximilians University Munich, ¶University of Bonn, Department of Nutritional Epidemiology.

**Sweden Clinical Center:** Åke Lernmark, Ph.D., PI<sup>1,3,4,5,6,8,10,11,15</sup>, Daniel Agardh, M.D., Ph.D.<sup>6,13</sup>, Carin Andrén Aronsson, Ph.D.<sup>2,12,13</sup>, Maria Ask, Jenny Bremer, Corrado Cilio, Ph.D., M.D.<sup>5,6</sup>, Emelie Ericson-Hallström, Annika Fors, Lina Fransson, Thomas Gard, Rasmus Bennet, Monika Hansen, Susanne Hyberg, Hanna Jisser, Fredrik Johansen, Berglind Jonsdottir, M.D., Ph.D.<sup>12</sup>, Silviya Jovic, Helena Elding Larsson, M.D., Ph.D.<sup>6,14</sup>, Marielle Lindström, Markus Lundgren, M.D., Ph.D.<sup>14</sup>, Maria Månsson-Martinez, Maria Markan, Jessica Melin<sup>12</sup>, Zeliha Mestan, Caroline Nilsson, Karin Ottosson, Kobra Rahmati, Anita Ramelius, Falastin Salami, Anette Sjöberg, Birgitta Sjöberg, Carina Törn, Ph.D.<sup>3,15</sup>, Anne Wallin, Åsa Wimar<sup>14</sup>, Sofie Åberg. Lund University.

**Washington Clinical Center:** William A. Hagopian, M.D., Ph.D., PI<sup>1,3,4,5,6,7,11,13,14</sup>, Michael Killian<sup>6,7,12,13</sup>, Claire Cowen Crouch<sup>12,14,15</sup>, Jennifer Skidmore<sup>2</sup>, Ashley Akramoff, Masumeh Chavoshi, Kayleen Dunson, Rachel Hervey, Rachel Lyons, Arlene Meyer, Denise Mulenga<sup>12</sup>, Jared Radtke, Matei Romancik, Davey Schmitt, Julie Schwabe, Sarah Zink. Pacific Northwest Research Institute.

**Pennsylvania Satellite Center:** Dorothy Becker, M.D., Margaret Franciscus, MaryEllen Dalmagro-Elias Smith<sup>2</sup>, Ashi Daftary, M.D., Mary Beth Klein, Chrystal Yates. Children's Hospital of Pittsburgh of UPMC.

**Data Coordinating Center:** Jeffrey P. Krischer, Ph.D., PI<sup>1,4,5,10,11</sup>, Sarah Austin-Gonzalez, Maryouri Avendano, Sandra Baethke, Rasheedah Brown<sup>12,15</sup>, Brant Burkhardt, Ph.D.<sup>5,6</sup>, Martha Butterworth<sup>2</sup>, Joanna Clasen, David Cuthbertson, Christopher Eberhard, Steven Fiske<sup>9</sup>, Jennifer Garmeson, Veena Gowda, Kathleen Heyman, Belinda Hsiao, Christina Karges, Francisco Perez Laras, Hye-Seung Lee, Ph.D.<sup>1,2,3,13,15</sup>, Qian Li<sup>2,3</sup>, Shu Liu, Xiang Liu,

Ph.D.<sup>2,3</sup>, Kristian Lynch, Ph.D.<sup>5,6,9,15</sup>, Colleen Maguire, Jamie Malloy, Cristina McCarthy<sup>12,15</sup>, Aubrie Merrell, Steven Meulemans, Hemang Parikh, Ph.D.<sup>3</sup>, Ryan Quigley, Cassandra Remedios, Chris Shaffer, Laura Smith, Ph.D.<sup>9,12</sup>, Susan Smith<sup>12,15</sup>, Noah Sulman, Ph.D., Roy Tamura, Ph.D.<sup>1,2,12,13,14</sup>, Dena Tewey, Michael Toth, Ulla Uusitalo, Ph.D.<sup>2,15</sup>, Kendra Vehik, Ph.D.<sup>4,5,6,9,14,15</sup>, Ponni Vijayakandipan, Keith Wood, Jimin Yang, Ph.D., R.D.<sup>2,15</sup>.  
*Past staff: Michael Abbondandolo, Lori Ballard, David Hadley, Ph.D., Wendy McLeod.* University of South Florida.

**Autoantibody Reference Laboratories:** Liping Yu, M.D.<sup>^5</sup>, Dongmei Miao, M.D.<sup>^</sup>, Polly Bingley, M.D., FRCP\*<sup>5</sup>, Alistair Williams\*, Kyla Chandler\*, Olivia Ball\*, Ilana Kelland\*, Sian Grace\*, Ben Gillard\*. <sup>^</sup>Barbara Davis Center for Childhood Diabetes, University of Colorado Denver, \*Bristol Medical School, University of Bristol UK.

**HLA Reference Laboratory:** William Hagopian<sup>3</sup>, MD, PhD, Masumeh Chavoshi, Jared Radtke, Julie Schwabe. Pacific Northwest Research Institute, Seattle WA. (Previously Henry Erlich, Ph.D.<sup>3</sup>, Steven J. Mack, Ph.D., Anna Lisa Fear. Center for Genetics, Children's Hospital Oakland Research Institute.)

**Metagenomics and Microbiome Laboratory:** Joseph F. Petrosino, Ph.D.<sup>6\*</sup>, Nadim J. Ajami, Ph.D.<sup>\*</sup>, Richard E. Lloyd, Ph.D.<sup>6\*</sup>, Matthew C. Ross, Ph.D.<sup>\*</sup>, Jacqueline L. O'Brien, Ph.D.<sup>\*</sup>, Diane S. Hutchinson, Ph.D.<sup>\*</sup>, Daniel P. Smith, Ph.D.<sup>\*</sup>, Matthew C. Wong\*, Xianjun Tian, Ph.D.<sup>\*</sup>, Tulin Ayvaz\*, Auriole Tamegnon\*, Nguyen Truong\*, Hannah Moreno\*, Lauren Riley\*, Eduardo Moreno\*, Tonya Bauch\*, Lenka Kusic\*, Ginger Metcalf<sup>^</sup>, Donna Muzny<sup>^</sup>, HarshaVardhan Doddapaneni, Ph.D.<sup>^</sup>, Richard Gibbs, Ph.D.<sup>^</sup>. \*Alkek Center for Metagenomics and Microbiome Research, Department of Molecular Virology and Microbiology, Baylor College of Medicine, <sup>^</sup>Human Genome Sequencing Center, Baylor College of Medicine.

**Repository:** Sandra Ke, Niveen Mulholland, Ph.D. NIDDK Biosample Repository at Fisher BioServices.

**SNP Laboratory:** Stephen S. Rich, Ph.D.<sup>3</sup>, Wei-Min Chen, Ph.D.<sup>3</sup>, Suna Onengut-Gumuscu, Ph.D.<sup>3</sup>, Emily Farber, Rebecca Roche Pickin, Ph.D., Jonathan Davis, Jordan Davis, Dan Gallo, Jessica Bonnie, Paul Campolieto. Center for Public Health Genomics, University of Virginia.

**Project scientist:** Beena Akolkar, Ph.D.<sup>1,3,4,5,6,7,10,11</sup>. National Institutes of Diabetes and Digestive and Kidney Diseases.

**Other contributors:** Kasia Bourcier, Ph.D.<sup>5</sup>, National Institutes of Allergy and Infectious Diseases. Thomas Briese, Ph.D.<sup>6,15</sup>, Columbia University. Suzanne Bennett Johnson, Ph.D.<sup>9,12</sup>, Florida State University. Eric Triplett, Ph.D.<sup>6</sup>, University of Florida.

#### ***Committees:***

<sup>1</sup>Ancillary Studies, <sup>2</sup>Diet, <sup>3</sup>Genetics, <sup>4</sup>Human Subjects/Publicity/Publications, <sup>5</sup>Immune Markers, <sup>6</sup>Infectious Agents, <sup>7</sup>Laboratory Implementation, <sup>8</sup>Maternal Studies, <sup>9</sup>Psychosocial, <sup>10</sup>Quality Assurance, <sup>11</sup>Steering, <sup>12</sup>Study Coordinators, <sup>13</sup>Celiac Disease, <sup>14</sup>Clinical Implementation, <sup>15</sup>Quality Assurance Subcommittee on Data Quality.
